# Supplementary material for: Detection and characterisation of canine astrovirus, canine parvovirus and canine papillomavirus in puppies using next generation sequencing
Source: PubMed Central journal article supplement (PMC6418273; doi:10.1038/s41598-019-41045-z), 2019-03-14
Supplement: 41598_2019_41045_MOESM1_ESM.pdf [file 41598_2019_41045_MOESM1_ESM.pdf]

**Detection and characterisation of canine astrovirus, canine parvovirus and canine papillomavirus in puppies using next generation sequencing**

**Tarka Raj Bhatta<sup>1,2</sup>, Anthony Chamings<sup>1,2</sup>, Jessy Vibin<sup>1,2</sup> & Soren Alexandersen<sup>\*1,2,3</sup>**

<sup>1</sup>Geelong Centre for Emerging Infectious Diseases, Geelong, VIC 3220, Australia; <sup>2</sup>Deakin University, School of Medicine, Geelong, VIC 3220, Australia; <sup>3</sup>Barwon Health, University Hospital Geelong, Geelong, VIC 3220 Australia

\*Corresponding Author: [soren.alexandersen@deakin.edu.au](mailto:soren.alexandersen@deakin.edu.au)

**Supplementary Table S1. Comparison of the canine astrovirus near complete sequence of DF-BC15- CAV-AUS-2017 with selected reference sequences from Genbank.**

| <b>Virus Sequence from dog samples</b> | <b>NCBI reference sequence</b>  | <b>Nucleotide match</b> | <b>Identity %</b> |
|----------------------------------------|---------------------------------|-------------------------|-------------------|
| DF-BC15-CAV-AUS-2017                   | KP404149-CAV-Gillingham-UK-2012 | 6260/6611               | 94.69             |
| DF-BC15-CAV-AUS-2017                   | KX599350-CAV-6-HUN-2012         | 6169/6576               | 93.81             |
| DF-BC15-CAV-AUS-2017                   | KX599351-CAV-115-HUN-2012       | 5848/6563               | 89.11             |
| DF-BC15-CAV-AUS-2017                   | KX599353-CAV-135-HUN-2012       | 5811/6565               | 88.51             |
| DF-BC15-CAV-AUS-2017                   | KX599349-CAV-2-HUN-2012         | 5800/6566               | 88.33             |
| DF-BC15-CAV-AUS-2017                   | KY765684-CTAV-BRA-2015          | 5762/6559               | 87.85             |
| DF-BC15-CAV-AUS-2017                   | KX756441-CAV-DD1-AUS-2012       | 5702/6507               | 87.62             |
| DF-BC15-CAV-AUS-2017                   | KP404150-CAV-Lincoln-UK-2012    | 5762/6583               | 87.53             |

**Supplementary Table S2. Comparison of the ORF1a sequence of DF-BC15-CAV-AUS-2017 with selected reference sequences from Genbank**

| <b>Canine astrovirus ORF1a sequence from dog samples</b> | <b>NCBI reference sequence</b>  | <b>Nucleotide match</b> | <b>Identity %</b> | <b>Amino acid match %</b> |
|----------------------------------------------------------|---------------------------------|-------------------------|-------------------|---------------------------|
| DF-BC15-CAV-ORF1a-AUS-2017                               | KX599350-CAV-6-HUN-2012         | 2572/2670               | 96.32             | 879/889 (98.87%)          |
| DF-BC15-CAV-ORF1a-AUS-2017                               | KX599351-CAV-115-HUN-2012       | 2559/2670               | 95.84             | 876/889 (98.54%)          |
| DF-BC15-CAV-ORF1a-AUS-2017                               | KP404149-CAV-Gillingham-UK-2012 | 2549/2670               | 95.46             | 882/889 (99.21%)          |
| DF-BC15-CAV-ORF1a-AUS-2017                               | KX756441-CAV-DD1-AUS-2012       | 2501/2670               | 93.67             | 876/889 (98.54%)          |
| DF-BC15-CAV-ORF1a-AUS-2017                               | KP404150-CAV-Lincoln-UK-2012    | 2478/2670               | 92.81             | 872/889 (98.08%)          |

**Supplementary Table S3. Comparison of the seven different regions of the canine parvovirus sequence generated by NGS with the reference sequence (M38245) from Genbank.**

| <b>Regions of DF-BC16-CPV-AUS-2017</b> | <b>Reference sequence</b> | <b>Query Cover %</b> | <b>Nucleotide match</b> | <b>Identity %</b> | <b>Nucleotide differences</b>                                                          | <b>Amino acid match %</b> |
|----------------------------------------|---------------------------|----------------------|-------------------------|-------------------|----------------------------------------------------------------------------------------|---------------------------|
| Non-coding-NS1 (163-486)               | M38245-CPV-b-USA-1990     | 100                  | 324/324                 | 100               | -                                                                                      | 71 /71 (100%)             |
| NS1 (631-1083)                         | M38245-CPV-b-USA-1990     | 100                  | 452/453                 | 99.8              | A-G at 941                                                                             | 150/150 (100%)            |
| NS1 (1844-2162)                        | M38245-CPV-b-USA-1990     | 100                  | 318/319                 | 99.7              | A-G at 2024                                                                            | 106/106 (100%)            |
| VP1, splice (2273-2730)                | M38245-CPV-b-USA-1990     | 100                  | 457/458                 | 99.8              | G-A at 2341 in intron                                                                  | 124/124 (100%)            |
| VP2 (2886-3450)                        | M38245-CPV-b-USA-1990     | 100                  | 563/565                 | 99.6              | A-T at 3045<br>T-C at 3088                                                             | 186/188 (99%)             |
| VP2 (3593-4213)                        | M38245-CPV-b-USA-1990     | 100                  | 615/621                 | 99.0              | T-G at 3675<br>C-G at 3685<br>G-T at 3699<br>T-A at 3749<br>A-G at 3909<br>A-G at 4062 | 200/206 (97%)             |
| Non-coding (4711-4850)                 | M38245-CPV-b-USA-1990     | 100                  | 139/140                 | 99.3              | T-C at 4789                                                                            | Non-coding                |

**Supplementary Table S4. Comparison of the eight different sequences obtained from four regions of canine papillomavirus 17 sequence generated by NGS with the reference sequence (KT272399) from Genbank.**

| <b>Region of DS-CPapV-AUS-2017</b> | <b>Reference sequence</b> | <b>Nucleotide match</b> | <b>Identity %</b> | <b>Nucleotide differences</b> | <b>Amino acid match %</b>           |
|------------------------------------|---------------------------|-------------------------|-------------------|-------------------------------|-------------------------------------|
| E1 (750-957)                       | KT272399-CpapV-17-NZ-2014 | 208/208                 | 100               | ---                           | 69/69 (100%)                        |
| E2 (2963-3161)                     | KT272399-CpapV-17-NZ-2014 | 199/199                 | 100               | ---                           | 66/66 (100%)                        |
| Bet. E2 & L2 (4070-4360)           | KT272399-CpapV-17-NZ-2014 | 291/291                 | 100               | ---                           | Non-Coding                          |
| L2 (4572-4784)                     | KT272399-CpapV-17-NZ-2014 | 213/213                 | 100               | ---                           | 70/70 (100%)                        |
| L2 (4822-5022)                     | KT272399-CpapV-17-NZ-2014 | 200/201                 | 99.5              | G-A at 4909                   | 66/66 (100%)                        |
| L2 (5616-5826)                     | KT272399-CpapV-17-NZ-2014 | 210-211/211             | 99.5-100          | C/T at 5695                   | 69/69 (100%)                        |
| L2, NCR, L1 (5872-6198)            | KT272399-CpapV-17-NZ-2014 | 326/327                 | 99.6              | G-A at 6173                   | L2: 37/37 (100%)<br>L1:65/65 (100%) |
| L1 (6625-7032)                     | KT272399-CPapV-17-NZ-2014 | 406/408                 | 99.5              | A-G at 6698<br>T-C at 6968    | 135/135 (100%)                      |

**Supplementary Table S5. Comparison of the different regions of canine papillomavirus 4 and 8 sequences generated by NGS with reference sequences (EF584537) and (HQ262536) respectively from Genbank.**

| <b>Sequence name</b>     | <b>Region</b>  | <b>Reference sequence</b>   | <b>Nucleotide match</b> | <b>Identity %</b>     | <b>Amino acid match %</b> |
|--------------------------|----------------|-----------------------------|-------------------------|-----------------------|---------------------------|
| DS-BC18-CPapV-4-AUS-2017 | E7 (634-773)   | EF584537-CPapV-4-Swiss-2007 | 140/140                 | 100                   | 46/46 (100%)              |
| DS-BC16-CPapV-4-AUS-2017 | E1 (1678-1844) | EF584537-CPapV-4-Swiss-2007 | 167/167                 | 100                   | 55/55 (100%)              |
| DS-BC16-CPapV-4-AUS-2017 | E2 (3993-4106) | EF584537-CPapV-4-Swiss-2007 | 114/114                 | 100                   | 37/37 (100%)              |
| DS-BC16-CPapV-4-AUS-2017 | L2 (4682-4943) | EF584537-CPapV-4-Swiss-2007 | 261/262                 | 99.6<br>A → T at 4749 | 86/86 (100%)              |
| DS-BC18-CPapV-8-AUS-2017 | E1 (758-981)   | HQ262536-CPapV-8-Swiss-2010 | 224/224                 | 100                   | 74/74 (100%)              |
| DS-BC18-CPapV-8-AUS-2017 | E2 (2898-3292) | HQ262536-CPapV-8-Swiss-2010 | 395/395                 | 100                   | 131/131 (100%)            |
| DS-BC18-CPapV-8-AUS-2017 | L1 (6109-6392) | HQ262536-CPapV-8-Swiss-2010 | 284/284                 | 100                   | 94/94 (100%)              |

**Supplementary Table S6. The virus sequences from reference Genbank used for initial mapping of NGS reads.**

| <b>Sample</b>       | <b>Virus</b>             | <b>Genbank reference sequence used for TMAP</b> |
|---------------------|--------------------------|-------------------------------------------------|
| DF-1-2-AUS-2017     | Canine astrovirus        | KP404149-CAV-Gillingham-UK-2012                 |
| DF-1-2-AUS-2017     | Canine parvovirus        | M38245-CPV-b-USA-1990                           |
| DS-3-4-5-6-AUS-2017 | Canine papillomavirus 17 | KT272399-CPapV-17-NZ-2014                       |
| DS-4-AUS-2017       | Canine papillomavirus 4  | EF584537-CPapV-4-Swiss-2007                     |
| DS-6-AUS-2017       | Canine papillomavirus 8  | HQ262536-CPapV-8-Swiss-2010                     |
